# Supplementary material for: Analysis of Genes Associated with Feeding Preference and Detoxification in Various Developmental Stages of Aglais urticae
Source: MDPI journal article supplement (doi:10.3390/insects15010030), 2024-01-03
Supplement: s1 [file s1]

Table S1 Primer used for qRT-PCR analysis

| Gene         | Primer sequence (5'~3')   |
|--------------|---------------------------|
| beta-actin-F | AATGCTGTGATTTCCTTCTGC     |
| beta-actin-R | CTCTCTTCCAGCCCTCATTCT     |
| CarE-F       | GTAGTATCATCAGTAATGGGAAACG |
| CarE-R       | TGCCAAAGGAATATCCAGAAA     |
| GST-F        | TCCACAACACACAGTTCCGAC     |
| GST-R        | AATCTTTCGTCAACTATGCCTCTC  |
| SOD-F        | AAATGTGCGGTTTGTCGG        |
| SOD-R        | CACCAGCGTTTCCAGTCG        |
| CAT-F        | CCTGGTACTAAATGTGCTGGG     |
| CAT-R        | AAATGGAATCCTTTTGACTTGAC   |
